# Supplementary material for: mTORC1-Plin3 pathway is essential to activate lipophagy and protects against hepatosteatosis
Source: bioRxiv or medRxiv preprint supplement (doi:10.1101/812990), 2019-10-21

**A**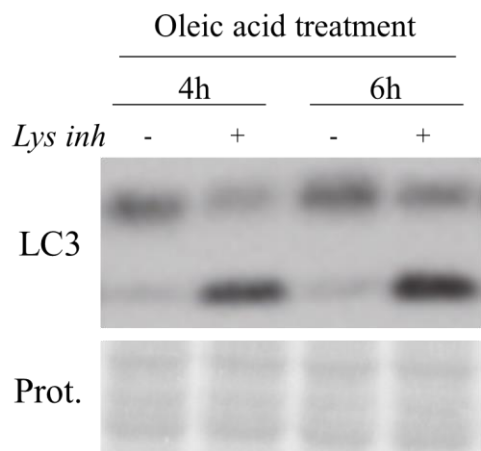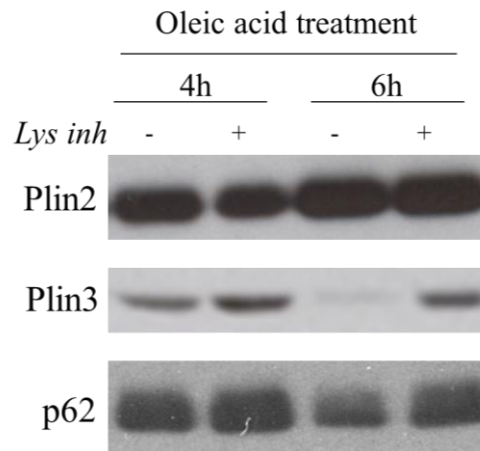**B**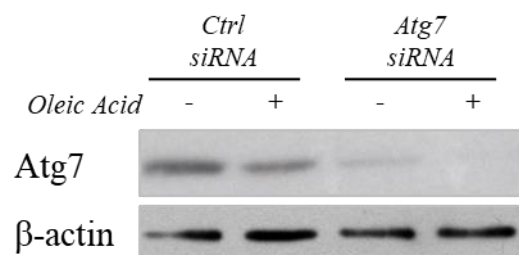**C**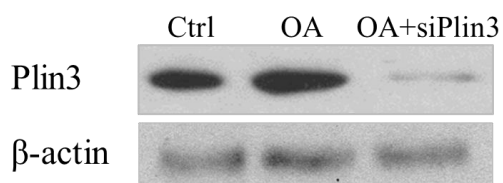

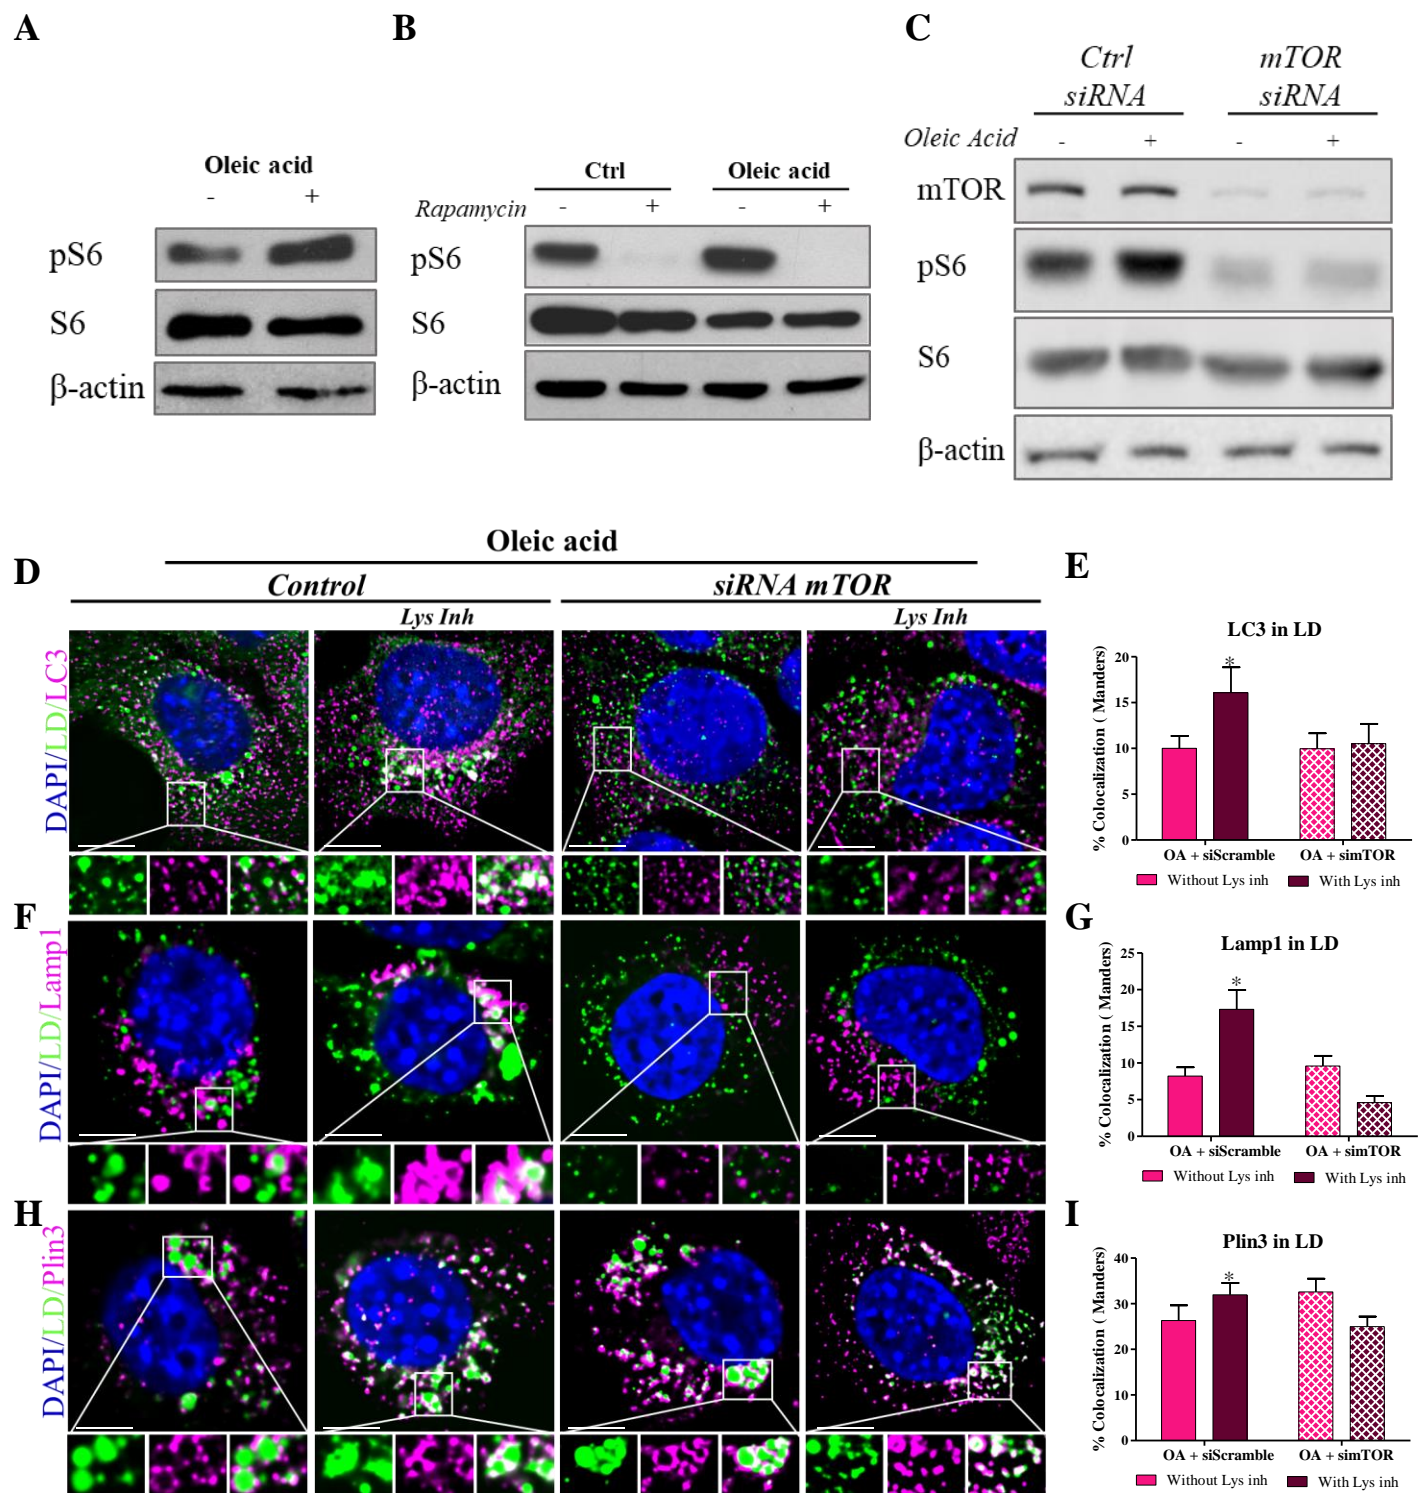

A

## Mitochondrial Respiration

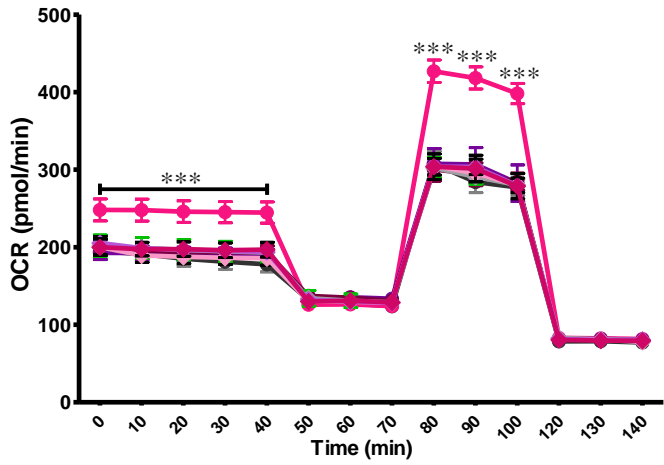

- siScramble Control
- siScramble Oleic acid
- siScramble Oleic acid+Etomoxir
- siScramble Oleic acid+Lys Inh
- siPlin3 Control
- siPlin3 Oleic acid
- siPlin3 Oleic acid+Etomoxir
- siPlin3 Oleic acid+Lys Inh

B

## Maximal Respiration

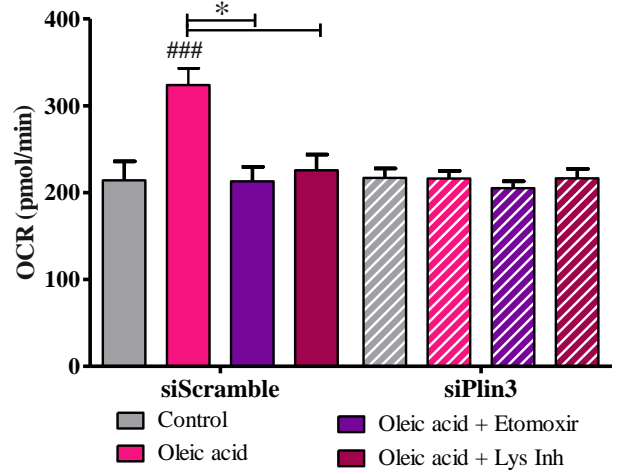

C

## ATP production

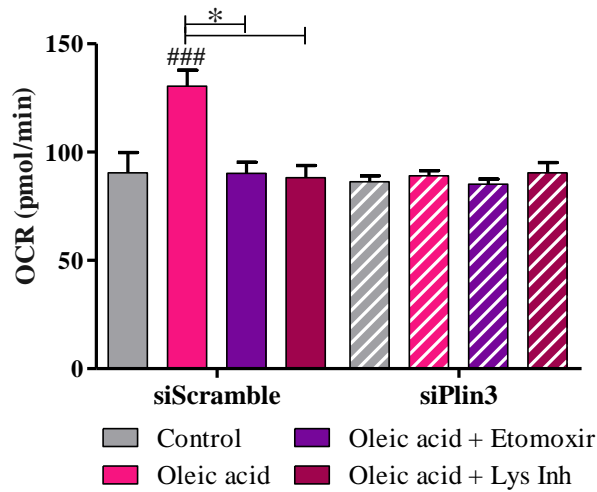

**A**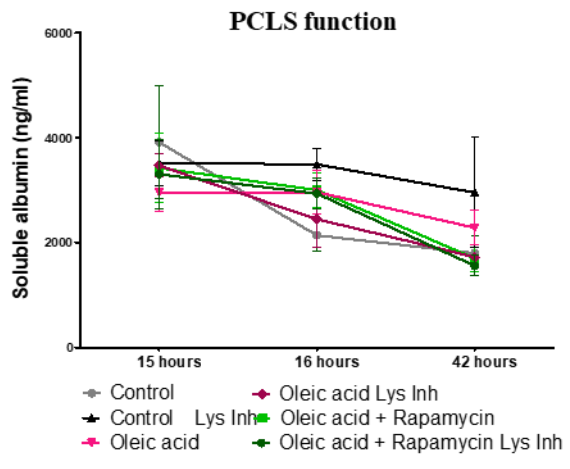**B**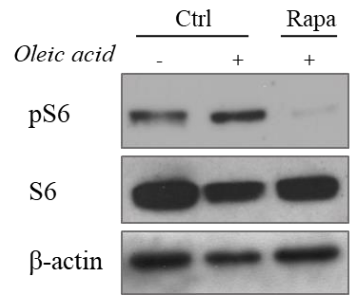

Supplement: Supplementary file [file media-1.pdf]
